1     ***Saccharomyces cerevisiae* strain YH166: a novel wild yeast for the production of tropical**  
2                                   **fruit sensory attributes in fermented beverages**

3  
4     Kara Osburn<sup>a</sup>, Robert Caputo<sup>b</sup>, Justin Miller<sup>b</sup>, and Matthew L. Bochman<sup>a,b\*</sup>

5  
6     <sup>a</sup>Molecular and Cellular Biochemistry Department, 212 South Hawthorne Drive, Simon Hall  
7     MSB1, room 405B, Indiana University, Bloomington, IN 47405, USA.

8     [klosburn@uemail.iu.edu](mailto:klosburn@uemail.iu.edu)

9     [bochman@indiana.edu](mailto:bochman@indiana.edu)

10

11    <sup>b</sup>Wild Pitch Yeast, Bloomington, IN 47405, USA.

12    [rob@drinkin.beer](mailto:rob@drinkin.beer)

13    [justin@blackacrebrewing.com](mailto:justin@blackacrebrewing.com)

14

15    \***Corresponding author:**  
16    Matthew L. Bochman, Ph.D.  
17    Assistant Professor  
18    Molecular and Cellular Biochemistry Department  
19    212 South Hawthorne Drive  
20    Simon Hall MSB1, room 405B  
21    Indiana University  
22    [bochman@indiana.edu](mailto:bochman@indiana.edu)  
23    812-856-2095

24

25 **Abstract**

26 All ales are fermented by various strains of *Saccharomyces cerevisiae*. However, recent whole-  
27 genome sequencing has revealed that most commercially available ale yeasts are highly related  
28 and represent a small fraction of the genetic diversity found among *S. cerevisiae* isolates as a  
29 whole. This lack of diversity limits the phenotypic variations between these strains, which  
30 translates into a limited number of sensory compounds created during fermentation. Here, we  
31 characterized a collection of wild *S. cerevisiae*, *S. kudriavzevii*, and *S. paradoxus* strains for their  
32 ability to ferment wort into beer. Although many isolates performed well, *S. cerevisiae* strain  
33 YH166 was the most promising, displaying excellent fermentation kinetics and attenuation, as  
34 well as a tropical fruit sensory profile. Use of this strain in multiple styles of beer suggested that  
35 it is broadly applicable in the brewing industry. Thus, YH166 is a novel ale strain that can be  
36 used to lend fruity esters to beer and should pair well with citrusy hops in hop-forward ales.

37

38 **Keywords:** *Saccharomyces cerevisiae*; yeast; fermentation; beer

39 **Chemical compounds studied in this article:** Ethanol (PubChem CID: 702); glucose  
40 (PubChem CID: 5793); maltose (PubChem CID: 6255); sucrose (PubChem CID: 5988); xylose  
41 (PubChem CID: 135191)

42 **Abbreviations:** EtOH, ethanol; YPD, yeast extract, peptone, and dextrose; NJ, neighbor-joining;  
43 OD<sub>660</sub>, optical density at 660 nm; OG, original gravity; FG, final gravity; ABV, alcohol by  
44 volume; NE-IPA, New England-style India pale ale

45

## 46 **1. Introduction**

47 Many fermented beverages, including beer, wine, kombucha, and kefir, are produced (at  
48 least in part) by the metabolic action of yeasts in the genus *Saccharomyces* (1). These organisms  
49 are ubiquitous in such applications due to their naturally high levels of tolerance to ethanol  
50 (EtOH), low pH, osmotic stress, and anaerobic conditions (2-4). Of the eight species in the genus  
51 *Saccharomyces* (*S. arboricola*, *S. cerevisiae*, *S. eubayanus*, *S. jurei*, *S. kudriavzevii*, *S. mikatae*,  
52 *S. paradoxus*, and *S. uvarum*) (5), *S. cerevisiae* is most commonly found in traditionally  
53 fermented beverages and is used industrially for beverage fermentation and bioethanol  
54 production (1,6). Indeed, *S. cerevisiae* is used for ale and wine production worldwide.

55 However, recent research has shown that the *S. cerevisiae* strains currently used for these  
56 processes lack in genetic variability, with the *Saccharomyces pastorianus* strains used for lager  
57 production displaying even less diversity. Three different groups performed whole genome  
58 sequencing of 212 (7), 157 (8), and 28 (9) *S. cerevisiae* strains, most of which are used to make  
59 beer and wine. These studies found that industrial strains are polyphyletic, representing multiple  
60 (in the case of ale strains, three (8,9)) domestication events. However, among the individual  
61 clades of *S. cerevisiae* strains representing German, British, and wheat beer isolates, the yeasts  
62 are extremely genetically similar and display high levels of inbreeding (7). Further, they  
63 represent only a small fraction of the natural genetic diversity found among other sequenced  
64 examples of *S. cerevisiae*. This narrow genotypic and phenotypic variation among commercially  
65 available strains likely limits the spectrum of sensory compounds produced by these yeasts  
66 during fermentation. Notably, in beers that are not heavily hopped, the yeast can account for  $\geq$   
67 50% of the sensory profile of the finished beverage (10).

68           As such, much work has be performed to engineer strains with improved or altered  
69 fermentation and sensory compound production profiles. For instance, strains have been  
70 engineered to reduce haze development caused by polyphenolic compounds in beer (11) and  
71 eliminate the off-flavor compound diacetyl (12). However, many of these manipulations generate  
72 yeasts that are considered genetically modified organisms (GMOs) because selectable markers  
73 and heterologous genes are introduced into the *S. cerevisiae* genome. As there is a public bias  
74 against consuming GMO products (13), more recent efforts have focused on breeding and  
75 hybridization methods to produce yeasts that are viewed as non-GMOs. Indeed, several groups  
76 have made great strides in this area (14-16). Such projects tend to be labor- and cost-intensive  
77 though. An alternate to constructing new brewing strains with desired sensory attributes is bio-  
78 prospecting for wild isolates with these phenotypes. Indeed, wild *S. cerevisiae* strains represent  
79 an untapped reservoir of aromas and flavors in beverage fermentation. We define wild strains as  
80 those isolated via open fermentation (*i.e.*, air capture) or from environmental samples (*e.g.*, soil  
81 and plant matter).

82           Here, we characterized a collection of wild *Saccharomyces* strains (17,18) for their  
83 evolutionary relatedness to each other and commercially available ale strains, their ability to  
84 metabolize mono- and disaccharides, their EtOH tolerance, and ability to ferment wort into  
85 palatable beer. Of the isolates tested, *S. cerevisiae* strain YH166 stood out for its excellent  
86 fermentation kinetics, EtOH and osmotic stress tolerance, and pleasing sensory attributes that  
87 were reminiscent of tropical fruit. We suggest that the use of wild strains such as YH166 for  
88 beverage fermentation will represent the next trend in the ongoing global craft beverage  
89 revolution.

90

## 91 2. Materials and methods

### 92 2.1. Strains, media, and other reagents

93 *S. cerevisiae* strains WLP001 and WLP300 were purchased from White Labs (San Diego,  
94 CA). Wild strains were isolated as described in (17). All yeast strains were grown on yeast  
95 extract, peptone, and dextrose (YPD; 1% (w/v) yeast extract, 2% (w/v) peptone, and 2% (w/v)  
96 glucose) plates containing 2% (w/v) agar at 30°C and in YPD liquid culture at 30°C with  
97 aeration unless otherwise noted. All strains were stored as 15% (v/v) glycerol stocks at -80°C.  
98 Media components were from Fisher Scientific (Pittsburgh, PA, USA) and DOT Scientific  
99 (Burnton, MI, USA). All other reagents were of the highest grade commercially available.

### 100 2.2. Phylogenetic analysis

101 The wild *Saccharomyces* strains were identified at the species level by sequencing the  
102 variable D1/D2 portion of the eukaryotic 26S rDNA as described (18). After species  
103 identification, the phylogenetic relationships among the strains were determined by aligning their  
104 rDNA sequences using ClustalX (19). The alignments were iterated at each step but otherwise  
105 utilized default parameters. ClustalX was also used to draw and bootstrap neighbor-joining (N-J)  
106 phylogenetic trees using 1000 bootstrap trials; the trees were visualized with TreeView v. 1.6.6  
107 software (<http://taxonomy.zoology.gla.ac.uk/rod/rod.html>). The *Schizosaccharomyces pombe*  
108 rDNA sequence (GenBank accession HE964968) was included in the alignments as the  
109 outgroup, and this was used to root the N-J tree in TreeView. WLP001 and WLP300 were  
110 included to determine the relatedness of the wild strains to commercially available ale yeasts.  
111 Sequences for other *Saccharomyces* species were retrieved from the Nucleotide database of the

112 National Center for Biotechnology Information (NCBI;  
113 <https://www.ncbi.nlm.nih.gov/nucleotide/>).

### 114 *2.3. Sugar metabolism*

115 The yeast strains were grown by inoculating 5 mL YPD liquid medium with single  
116 colonies from YPD plates and incubation overnight at 30°C with aeration. The optical density at  
117 660 nm (OD<sub>660</sub>) of each culture was determined using a Beckman Coulter DU730 UV/Vis  
118 Spectrophotometer. Then, the cells were diluted to an OD<sub>660</sub> = 0.1 in 200 µL YPD medium  
119 containing 2% (w/v) glucose, maltose, sucrose, or xylose in round-bottom 96-well plates,  
120 overlaid with 50 µL mineral oil to prevent evaporation, and incubated at 30°C with shaking in a  
121 BioTek Synergy H1 plate reader. The OD<sub>660</sub> of every well was measured and recorded every 15  
122 min for 14-15 h, and these values were plotted vs. time to generate growth curves. All growth  
123 experiments were repeated ≥ 3 times, and the plotted points represent the average OD<sub>660</sub> values.  
124 Error bars representing standard deviations were omitted for clarity.

### 125 *2.4. EtOH and glucose tolerance*

126 Ethanol tolerance was measured as above but in 96-well plates containing YPD liquid  
127 medium or YPD liquid medium supplemented with 5, 10, or 15% EtOH. Glucose tolerance was  
128 likewise assessed in 96-well plates containing YPD liquid medium (2% (w/v) glucose) or YP  
129 liquid medium supplemented with 10, 20, or 30% (w/v) glucose.

### 130 *2.5. Test fermentations*

131 Laboratory-scale fermentations were performed as described (18). Briefly, the yeast  
132 strains were grown to saturation in 4 mL of YPD liquid medium and used to inoculate ~400 mL  
133 of blonde ale wort (1.050 original gravity (OG)) in 500-mL glass fermenters fitted with standard

134 plastic airlocks. The fermenting cultures were incubated at ~22°C for 2 weeks. Un-inoculated  
135 wort was treated as above to control for wort sterility. Prior to bottling into standard 12-oz brown  
136 glass bottles, their final gravity (FG) was measured using a MISCO digital refractometer (Solon,  
137 OH). Flocculation was qualitatively judged by comparing the clarity of the experimental beers to  
138 control beers fermented with *S. cerevisiae* WLP001 or WLP300, which routinely display  
139 medium or low flocculation, respectively (<http://www.whitelabs.com/yeast-bank>). Bottle  
140 conditioning was conducted as in (20) at room temperature for  $\geq 2$  weeks. The comparisons  
141 between WLP001 and YH166 fermentations were conducted in 1-L glass cylinders (30 cm tall,  
142 7.5 cm inner diameter) for 6-7 days at an average temperature of  $23.6 \pm 0.3^\circ\text{C}$ . The gravity and  
143 alcohol by volume (ABV) were monitored in real time using BeerBug digital hydrometers  
144 (Sensor Share, Richmond, VA). Small-batch (15-20 L) fermentations were performed by the  
145 Bloomington Hop Jockeys (<http://hopjockeys.org>) home brewing club (Bloomington, IN).  
146 Multiple worts were produced for these trials, which are detailed in the Supplementary Materials.

147

### 148 **3. Results**

#### 149 *3.1. Phylogeny of the wild Saccharomyces strains*

150 As we previously reported (17,18), we have isolated hundreds of wild yeasts with the  
151 potential for use in the beverage fermentation industry (Supplemental Table 1). Among the  
152 strains isolated, many *Saccharomyces* species were uncovered, including 37 *S. cerevisiae*, eight  
153 *S. paradoxus*, and one *S. kudriavzevii* (18). Because some of these samples came from locations  
154 in and around production breweries, we screened them for potential contamination by  
155 commercial strains of brewer's yeast. To do so, we aligned the D1/D2 region of their rDNA and

156 constructed a phylogenetic tree to compare the evolutionary relatedness of the isolated strains  
157 with commercial controls and previously annotated D1/D2 sequences from multiple  
158 *Saccharomyces* species (Fig. 1). We found that the yeasts clustered into five distinct clades (I-V),  
159 with the wild *S. paradoxus* and *S. kudriavzevii* strains all contained within Clade IV. The two  
160 commercial strains WLP001 and WLP300 were grouped into Clade V and appear to be closely  
161 related to the YH196 and WYP75 isolates, respectively. This suggests that YH196 and WYP75  
162 could be commercial contaminants, and thus, they were excluded from further analyses. It is  
163 unclear why the *S. cerevisiae* isolates clustered into four clades (I-III and V) rather than a single  
164 group.

### 165 3.2. Characterization of sugar metabolism, ethanol tolerance, and flocculation.

166 To begin to triage the isolated *Saccharomyces* strains for those most likely to perform  
167 well in beer fermentation, we sought to characterize their abilities to metabolize various sugars,  
168 their ethanol tolerance, and how well they flocculate. First, to assay for sugar metabolism, we  
169 followed the growth of each strain in rich medium (YP) supplemented with 2% (w/v) of two  
170 common monosaccharides (glucose and xylose) and disaccharides (maltose and sucrose). We  
171 found that the wild isolates could be phenotypically categorized into four groups (Supplemental  
172 Table 1), representatives of which are shown in Figure 2A-D. Yeasts in Group 1 could  
173 equivalently utilize the preferred sugars glucose and sucrose but displayed little-to-no growth in  
174 the presence of xylose and maltose (Fig. 2A). Strains in Group 2 were likewise able to  
175 metabolize glucose and sucrose, as well as displayed an intermediate level of growth in medium  
176 containing maltose (Fig. 2B). The isolates in Group 3 displayed similar growth kinetics and cell  
177 densities in the presence of glucose, maltose, and sucrose but weak growth in xylose-containing  
178 medium (Fig. 2C). Finally, the yeasts in Group 4 grew well in the presence of all four tested



179 carbon sources but achieved the highest cell densities in medium containing glucose or sucrose  
180 (Fig. 2D). It should be noted that *S. cerevisiae* is generally considered incapable of metabolizing  
181 xylose, but it does encode an endogenous xylose utilization pathway that can be activated by the  
182 over-expression of the nonspecific aldose reductase *GRE3* and the xylitol dehydrogenase *XYL2*  
183 genes (21). We hypothesize that *GRE3* and *XYL2* are naturally upregulated in the Group 3 and 4  
184 yeasts that grew in the presence of xylose as the sole carbon source.

185         Next, ethanol tolerance was similarly assessed by growing strains in YPD medium  
186 containing 0-15% ABV. Again, the various strains could be grouped based on their growth  
187 curves. As shown in Figure 3A, some strains were insensitive to increasing EtOH concentrations,  
188 growing as rapidly and to nearly as great a density in the presence of 15% ABV as in the  
189 complete absence of EtOH. Other strains displayed similar sensitivities to all concentrations of  
190 EtOH tested, though growth was still evident (Fig. 3B). However, most strains displayed a  
191 concentration-dependent sensitivity to EtOH, with higher ABVs increasingly inhibiting growth  
192 (Fig. 3C). Regardless, all strains grew to some extent in the presence of 15% ABV (Fig. 3 and  
193 data not shown), corresponding to the well-documented natural EtOH tolerance of  
194 *Saccharomyces* species (2-4).

195         Flocculation was qualitatively assessed by comparing the rate of cell sedimentation by  
196 the wild strains to two commercial controls WLP001 and WLP300 (medium and low  
197 flocculation, respectively, see [www.whitelabs.com](http://www.whitelabs.com)) in small stationary liquid cultures and in  
198 small fermenters. In both cases, all of the wild strains displayed medium or higher levels of  
199 flocculation (Table 1, Supplementary Table 1, and data not shown). However, we did also note  
200 that some of the strains formed rather loose slurries that were easily disrupted, sending cells back  
201 into suspension with only gentle agitation.

### 202 3.3. *Small-scale fermentations*

203           Aside from the strains that metabolized maltose poorly (*e.g.*, YH37; Fig. 2A), the other  
204 wild isolates all displayed good beer fermentation potential based on our initial tests. To begin to  
205 characterize the brewing capacity of these strains, we performed small wort fermentations with  
206 each. We utilized WLP001 as a positive control for levels of attenuation and flocculation, as well  
207 as a baseline for our sensory analyses. After two rounds of test brewing and analysis, we chose  
208 the most promising strains for additional trials. The full data set can be found in Supplementary  
209 Table 1, and representative strains are shown in Table 1.

210           We found that the *S. paradoxus* isolates ranged in their ability to attenuate from 20-55%  
211 (Table 1 and Supplementary Table 1) with an average attenuation across all strains of ~37%.  
212 Aside from under-attenuation, the beers produced by *S. paradoxus* all smelled and tasted heavily  
213 of adhesive bandages, which was likely due to the production of chlorophenol (22). Thankfully,  
214 only two *S. cerevisiae* strains (WYP15 and WYP16) shared this sensory phenotype  
215 (Supplementary Table 1). Overall, the *S. cerevisiae* strains displayed better attenuation (average  
216 of 69%), though they varied widely from 17-95%. Many of the beers produced were neutral in  
217 aroma and flavor, though some were fruity, had a Belgian strain phenolic character, and/or were  
218 slightly tart and reminiscent of saison or farmhouse ales. The single isolate of *S. kudriavzevii*  
219 attenuated well (68%) and yielded neutral sensory characteristics (Table 1).

220           Of all of the wild *Saccharomyces* strains that we tested, YH166 repeatedly displayed  
221 good brewing characteristics, with excellent attenuation (70-80%), flocculation, and  
222 aroma/flavor production (Table 1). In every tasting panel that we conducted, the sensory profiles  
223 of the beers made by YH166 were consistently characterized as “tropical”, with notes of guava  
224 and green apple. Other strains also displayed similar attenuation and flocculation, but the beers

225 they produced were generally neutral in sensory and comparatively bland when sampled  
226 alongside beer fermented by YH166. Thus, we focused on YH166 for further characterization.

### 227 3.4. Brewing with YH166

228 *S. cerevisiae* YH166 was isolated from a spontaneous fermentation conducted in a vacant  
229 lot during the summer of 2015 in Indianapolis, IN (18). This wild fermented beer contained six  
230 distinct yeast strains: three isolates of *Brettanomyces bruxellensis* and one strain each of *Candida*  
231 *zeylanoides*, *S. cerevisiae* (YH166), and *Wickerhamomyces anomalus*. YH166 was the fastest  
232 growing and most vigorous fermenting strain of the six under laboratory conditions (data not  
233 shown). Indeed, when compared to WLP001 in laboratory-scale fermentations, YH166 reliably  
234 reached terminal attenuation >24 h faster, though its terminal ABV (~5.5%) was always slightly  
235 less than that produced by WLP001 (~6%; Fig. 4A).

236 We typically use low gravity wort for laboratory-scale fermentations. However, ale  
237 strains are commonly utilized in a variety of beer styles, some of which have very high OGs,  
238 such as Russian imperial stouts (23). To determine if YH166 could tolerate high gravity wort, we  
239 assessed the growth of this strain in rich medium containing 2-30% (w/v) glucose. As shown in  
240 Figure 4B, the lag time to exponential growth increased from < 1 h in 2% glucose to > 5 h in  
241 30% glucose. However, YH166 was able to overcome the osmotic stress of the glucose at all  
242 concentrations and grow to high density, suggesting that it is suitable for fermenting worts with a  
243 wide range of OGs.

244 Finally, we assessed the activity of YH166 in a variety of worts and fermentation  
245 conditions (see Supplementary Materials) with the help of the Bloomington Hop Jockeys, a local  
246 home brewing club. It should be noted that each fermentation experiment was only performed a

247 single time, but we feel that the range of conditions tested is still worthy of report. Consistent  
248 with our laboratory-scale fermentations, YH166 performed well in all of these trials and  
249 produced aromatic (Fig. 4C) and flavor profiles (Fig. 4D) that were reminiscent of apple/pear  
250 and tropical fruit. Contrary to the laboratory-scale experiments, however, these beers were  
251 uniformly cloudy or hazy in appearance (data not shown).

252

#### 253 **4. Discussion**

254 The natural tolerance displayed by *Saccharomyces* species to fermentation stresses such  
255 as ethanol, low pH, and anaerobic growth (2-4) have enabled these organisms to dominate most  
256 industries that rely on fermentation worldwide. However, many of the yeast strains that are  
257 currently used in these processes are highly genetically related (7,8). We sought to characterize  
258 wild *Saccharomyces* strains for their ability to ferment wort into beer to determine if novel  
259 sensory characteristics can be found in the untapped array of yeast isolates present in nature.

260 Based on phylogenetics (Fig. 1) and phenotypic analyses (Fig. 2-3, Tables 1, and  
261 Supplementary Table 1), the strains in our collection of wild yeasts could be divided into a  
262 variety of groups. It was our hope that one or more of the phylogenetic groups would be  
263 indicative of isolates with positive fermentation attributes to help direct future yeast hunting  
264 efforts. This largely proved not to be the case though. For instance, phylogenetic clade IV was  
265 dominated by *S. paradoxus* strains that fermented poorly and/or produced unpalatable beer (Fig.  
266 1), but clade IV also contained *S. kudriavzevii* WYP76, which produced quaffable beer. The only  
267 strain grouping that was relevant for beer fermentation was Group 1 in sugar metabolism (Fig.  
268 2A). Yeasts in Group 1 utilized maltose poorly and consequently attenuated poorly during

269 fermentation (Table 1 and data not shown). Such isolates will be avoided during our ongoing  
270 yeast bio-prospecting by only selecting for strains that can rapidly metabolize maltose.

271 Our current results also suggest that *S. paradoxus* strains should be avoided for beer  
272 fermentation. All eight tested here created a repulsive aroma and taste that was reminiscent of  
273 adhesive bandages (Table 1). This is a common off-flavor in beer production that is attributable  
274 to chlorinated phenols (24). Very little has been reported in the scientific literature about brewing  
275 with *S. paradoxus*, and it has been suggested that this is one of the only *Saccharomyces* species  
276 not used commercially for fermentation (25). Perhaps this dearth of information is due to off-  
277 putting sensory profiles produced by *S. paradoxus* strains. A brief survey of online resources  
278 indicated that home brewers and craft brewers have successfully used *S. paradoxus* in brewing  
279 without encountering an antiseptic or medicinal sensory profile, but these reports cannot be  
280 verified. Regardless, we collected all of our *S. paradoxus* strains from the bark of oak trees (18),  
281 so chlorophenol production appears to be a common characteristic of wild *S. paradoxus* isolated  
282 from this natural reservoir.

283 Unlike the *S. paradoxus* strains, most of the remaining *Saccharomyces* isolates tested  
284 produced beers with neutral or more flavorful and pleasing sensory profiles (Table 1). Not all of  
285 them attenuated to high levels, but flocculation matched or exceeded the WLP001 control. Serial  
286 re-inoculation of low-attenuating strains into wort for fermentation may help to “domesticate”  
287 such strains by adapting them to beer production (26), and ongoing experiments are investigating  
288 this issue. Many strains, such as YH166, were well suited to fermentation with no manipulation  
289 other than the process of enrichment and pure culturing (17).

290 We chose to focus on strain YH166 due to its excellent fermentation kinetics and tropical  
291 fruit sensory profile. In our laboratory-scale trials, it performed as well as the WLP001 ale

292 control strain (Fig. 4A) and demonstrated excellent resistance to osmotic stress (Fig. 4B),  
293 suggesting that it can be used to ferment beers with high OGs. YH166 was also amenable to a  
294 variety of beer styles when used by home brewers (see Supplementary Materials) and  
295 consistently produced sensory profiles with apple/pear and tropical fruit notes. Interestingly, the  
296 home brew experiments uniformly yielded beers that were hazy or cloudy in appearance, in  
297 contrast to the high flocculation we found in the laboratory (Table 1). Many factors affect  
298 flocculation (reviewed in (27)), and thus additional experiments should be performed to  
299 determine the effects of variables such as pH, wort gravity, temperature, and cations on YH166  
300 flocculation. Regardless, this lack of flocculation coupled with otherwise desirable brewing  
301 characteristics and fruity sensory attributes suggests that YH166 may be an attractive strain for  
302 New England-style India pale ale (NE-IPA) brewing. Indeed, NE-IPAs are cloudy-to-opaque and  
303 generally described as juicy and fruity (28). Thus, novel wild brewing strains such as YH166 can  
304 make an immediate impact on current trending styles of beer and could lead to the development  
305 of new beer styles based around the yeast as the core ingredient.

306

### 307 **Acknowledgements**

308 We thank the members of the Bloomington Hop Jockeys home brewing club for providing  
309 valuable brewing data for strain YH166, as well as members of the Bochman laboratory for  
310 critically reading this manuscript and providing feedback. This work was supported by startup  
311 funds from Indiana University, a Translational Research Pilot Grant from the Johnson Center for  
312 Entrepreneurship in Biotechnology, a grant from the American Homebrewers Association  
313 Research and Education Fund, and funds from Wild Pitch Yeast, LLC (to MLB).

314

315 **References**

- 316 1. Walker, G.M. and Stewart, G.G. (2016) *Saccharomyces cerevisiae* in the Production of  
317 Fermented Beverages. *Beverages*, **2**.
- 318 2. Tikka, C., Osuru, H.P., Atluri, N., Raghavulu, P.C., Yellapu, N.K., Mannur, I.S., Prasad,  
319 U.V., Aluru, S., K, N.V. and Bhaskar, M. (2013) Isolation and characterization of ethanol  
320 tolerant yeast strains. *Bioinformation*, **9**, 421-425.
- 321 3. Zhao, X.Q. and Bai, F.W. (2009) Mechanisms of yeast stress tolerance and its  
322 manipulation for efficient fuel ethanol production. *J Biotechnol*, **144**, 23-30.
- 323 4. Wimalasena, T.T., Greetham, D., Marvin, M.E., Liti, G., Chandelia, Y., Hart, A., Louis,  
324 E.J., Phister, T.G., Tucker, G.A. and Smart, K.A. (2014) Phenotypic characterisation of  
325 *Saccharomyces* spp. yeast for tolerance to stresses encountered during fermentation of  
326 lignocellulosic residues to produce bioethanol. *Microb Cell Fact*, **13**, 47.
- 327 5. Dujon, B.A. and Louis, E.J. (2017) Genome Diversity and Evolution in the Budding  
328 Yeasts (*Saccharomycotina*). *Genetics*, **206**, 717-750.
- 329 6. Tesfaw, A. and Assefa, F. (2014) Current Trends in Bioethanol Production by  
330 *Saccharomyces cerevisiae*: Substrate, Inhibitor Reduction, Growth Variables, Coculture,  
331 and Immobilization. *Int Sch Res Notices*, **2014**, 532852.
- 332 7. Borneman, A.R., Forgan, A.H., Kolouchova, R., Fraser, J.A. and Schmidt, S.A. (2016)  
333 Whole Genome Comparison Reveals High Levels of Inbreeding and Strain Redundancy  
334 Across the Spectrum of Commercial Wine Strains of *Saccharomyces cerevisiae*. *G3*.
- 335 8. Gallone, B., Steensels, J., Prahl, T., Soriaga, L., Saels, V., Herrera-Malaver, B.,  
336 Merlevede, A., Roncoroni, M., Voordeckers, K., Miraglia, L. *et al.* (2016) Domestication  
337 and Divergence of *Saccharomyces cerevisiae* Beer Yeasts. *Cell*, **166**, 1397-1410 e1316.
- 338 9. Goncalves, M., Pontes, A., Almeida, P., Barbosa, R., Serra, M., Libkind, D., Hutzler, M.,  
339 Goncalves, P. and Sampaio, J.P. (2016) Distinct Domestication Trajectories in Top-  
340 Fermenting Beer Yeasts and Wine Yeasts. *Curr Biol*, **26**, 2750-2761.
- 341 10. White, C. (1998), *Brew Your Own*, [https://byo.com/mead/item/62-7-fascinating-facts-](https://byo.com/mead/item/62-7-fascinating-facts-about-yeast)  
342 [about-yeast](https://byo.com/mead/item/62-7-fascinating-facts-about-yeast).
- 343 11. Cejnar, R., Hlozkova, K., Jelinek, L., Kotrba, P. and Dostalek, P. (2017) Development of  
344 engineered yeast for biosorption of beer haze-active polyphenols. *Appl Microbiol*  
345 *Biotechnol*, **101**, 1477-1485.
- 346 12. Fujii, T., Kondo, K., Shimizu, F., Sone, H., Tanaka, J. and Inoue, T. (1990) Application  
347 of a ribosomal DNA integration vector in the construction of a brewer's yeast having  
348 alpha-acetolactate decarboxylase activity. *Applied and environmental microbiology*, **56**,  
349 997-1003.
- 350 13. Maghari, B.M. and Ardekani, A.M. (2011) Genetically modified foods and social  
351 concerns. *Avicenna J Med Biotechnol*, **3**, 109-117.
- 352 14. Alexander, W.G., Peris, D., Pfannenstiel, B.T., Ofulente, D.A., Kuang, M. and Hittinger,  
353 C.T. (2016) Efficient engineering of marker-free synthetic allotetraploids of  
354 *Saccharomyces*. *Fungal Genet Biol*, **89**, 10-17.



- 355 15. Mertens, S., Steensels, J., Saels, V., De Rouck, G., Aerts, G. and Verstrepen, K.J. (2015)  
356 A large set of newly created interspecific *Saccharomyces* hybrids increases aromatic  
357 diversity in lager beers. *Applied and environmental microbiology*, **81**, 8202-8214.
- 358 16. Laureau, R., Loeillet, S., Salinas, F., Bergstrom, A., Legoix-Ne, P., Liti, G. and Nicolas,  
359 A. (2016) Extensive Recombination of a Yeast Diploid Hybrid through Meiotic  
360 Reversion. *PLoS Genet*, **12**, e1005781.
- 361 17. Osburn, K., Ahmad, N.N. and Bochman, M.L. (2016) Bio-prospecting, selection, and  
362 analysis of wild yeasts for ethanol fermentation. *Zymurgy*, **39**, 81-88.
- 363 18. Osburn, K., Amaral, J., Metcalf, S.R., Nickens, D.M., Rogers, C.M., Sausen, C., Caputo,  
364 R., Miller, J., Li, H., Tennessen, J.M. *et al.* (2017) Primary souring: a novel bacteria-free  
365 method for sour beer production. *bioRxiv*.
- 366 19. Larkin, M.A., Blackshields, G., Brown, N.P., Chenna, R., McGettigan, P.A., McWilliam,  
367 H., Valentin, F., Wallace, I.M., Wilm, A., Lopez, R. *et al.* (2007) Clustal W and Clustal  
368 X version 2.0. *Bioinformatics*, **23**, 2947-2948.
- 369 20. Rogers, C.M., Veatch, D., Covey, A., Staton, C. and Bochman, M.L. (2016) Terminal  
370 acidic shock inhibits sour beer bottle conditioning by *Saccharomyces cerevisiae*. *Food*  
371 *Microbiol*, **57**, 151-158.
- 372 21. Toivari, M.H., Salusjarvi, L., Ruohonen, L. and Penttila, M. (2004) Endogenous xylose  
373 pathway in *Saccharomyces cerevisiae*. *Applied and environmental microbiology*, **70**,  
374 3681-3686.
- 375 22. Russell, I., Hancock, I.F. and Stewart, G.G. (1983) Construction of Dextrin Fermentative  
376 Yeast Strains That Do Not Produce Phenolic Off-Flavors in Beer. *Journal of the*  
377 *American Society of Brewing Chemists*, **41**.
- 378 23. (2008), *2008 BJCP Style Guidelines*. Beer Judge Certification Program, Inc,  
379 <https://www.bjcp.org/2008styles/style13.php#1f>, Vol. 2017.
- 380 24. Hughes, P. (2011) *Beer: A Quality Perspective*. Academic Press.
- 381 25. Briggs, D., Boulton, C., Brookes, P. and Stevens, R. (2004) *Brewing: Science and*  
382 *Practice*. Woodhead, Cambridge, UK.
- 383 26. . Wyeast, <http://www.wyeastlab.com/yeast-harvesting-re-pitching>, Vol. 2017.
- 384 27. Soares, E.V. (2011) Flocculation in *Saccharomyces cerevisiae*: a review. *J Appl*  
385 *Microbiol*, **110**, 1-18.
- 386 28. Miller, N. (2017), *Craft Beer & Brewing Magazine*, [https://beerandbrewing.com/the-ipas-](https://beerandbrewing.com/the-ipas-of-new-england/)  
387 [of-new-england/](https://beerandbrewing.com/the-ipas-of-new-england/).

388

389



390 **Tables**

391 **Table 1. Laboratory-scale fermentation results of select strains.**

| Strain | Species <sup>a</sup>   | Attenuation <sup>b</sup> | Flocculation | Sensory                                                |
|--------|------------------------|--------------------------|--------------|--------------------------------------------------------|
| YH35   | <i>S. paradoxus</i>    | 27%                      | High         | Chlorophenol/bandage                                   |
| YH37   | <i>S. paradoxus</i>    | 44%                      | Medium       | Chlorophenol/bandage                                   |
| YH38   | <i>S. paradoxus</i>    | 41%                      | Medium       | Chlorophenol/bandage, vegetal                          |
| YH44   | <i>S. cerevisiae</i>   | 44%                      | Medium       | Clean, neutral                                         |
| YH76   | <i>S. paradoxus</i>    | 41%                      | Medium       | Chlorophenol/bandage                                   |
| YH124  | <i>S. cerevisiae</i>   | 31%                      | Medium       | Neutral                                                |
| YH166  | <i>S. cerevisiae</i>   | 70-80%                   | High         | Green apple, guava, dry, slightly tart, tropical fruit |
| WYP2   | <i>S. cerevisiae</i>   | 65-80%                   | Medium       | Clean, neutral, reminiscent of lager                   |
| WYP4   | <i>S. cerevisiae</i>   | 61%                      | Medium       | Silky mouthfeel, cereal grain notes                    |
| WYP5   | <i>S. cerevisiae</i>   | 61%                      | Medium       | Saison-like                                            |
| WYP6   | <i>S. cerevisiae</i>   | 75-85%                   | Medium       | Thin, farmhouse-like, pithy, earthy                    |
| WYP7   | <i>S. cerevisiae</i>   | 70-80%                   | Medium       | Crisp, dry, slightly bitter, reminiscent of champagne  |
| WYP43  | <i>S. cerevisiae</i>   | 60-80%                   | Medium       | Clean, fruity esters, Belgian phenolic                 |
| WYP76  | <i>S. kudriavzevii</i> | 68%                      | Medium       | Neutral                                                |
| WLP001 | <i>S. cerevisiae</i>   | 70-80%                   | Medium       | Clean, neutral, slightly fruity                        |

392

393 <sup>a</sup> All species are in the *Saccharomyces* genus.

394 <sup>b</sup> Strains displaying a range of attenuation were brewed with up to six times to delineate the  
395 range. The others were brewed with at least two times, and the greatest attenuation is reported.

396

397 **Figure legends**

398 **Figure 1. Evolutionary relationships among the wild *Saccharomyces* strains and two**

399 **commercially available ale yeasts.** The D1/D2 rDNA sequences of the indicated strains were

400 aligned, and the phylogenetic relationships among them were drawn as a rooted N-J tree using

401 *Schizosaccharomyces pombe* (ATCC16979) as the outgroup. Five distinct clades of strains are

402 marked with Roman numerals. The *S. paradoxus* strains are highlighted red, *S. mikatae* is light

403 blue, *S. arboricola* is green, the *S. kudriavzevii* strains are orange, *S. uvarum* is purple, and *S.*

404 *eubayanus* is dark blue. All *S. cerevisiae* strains are unhighlighted, though the two commercial

405 controls (WLP001 and WLP300) are boxed. Sequence data for strains without YH or WYP

406 designations were retrieved from the NCBI with the following accession numbers: *S. paradoxus*

407 KT972121, *S. mikatae* AB040996, *S. arboricola* JQ914741, *S. kudriavzevii* AB040995, *S.*

408 *uvarum* KJ469964, *S. eubayanus* LT594193.1, and *S. cerevisiae* S288C NR\_132207.1.

409 **Figure 2. Growth curves of representative strains utilizing various sugars.** Small liquid

410 cultures of the strains indicated on the y-axes were grown in 96-well plates in YP medium

411 supplemented with 2% (w/v) of the indicated sugars. The OD<sub>660</sub> of each well was monitored with

412 a plate reader. Four different phenotypes were found: A) yeasts in Group 1 grew poorly in the

413 presence of xylose and maltose; B) yeasts in Group 2 displayed a moderate level of growth in the

414 presence of maltose; C) yeasts in Group 3 grew very well in the presence of maltose; and D)

415 yeasts in Group 4 grew well in the presence of all tested sugars. The plotted points in each curve

416 represent the average OD<sub>660</sub> values of  $\geq 3$  independent experiments normalized to the highest

417 OD<sub>660</sub> in each experiment. The error bars are the standard deviation.

418 **Figure 3. EtOH tolerance of representative strains.** Small liquid cultures of the strains

419 indicated on the y-axes were grown in 96-well plates in YPD medium or YPD medium

420 supplemented with the indicated amount of EtOH. The OD<sub>660</sub> of each well was monitored with a  
421 plate reader. Four different phenotypes were found: A) tolerance of EtOH up to 15% (v/v), B)  
422 similar sensitivities to 5-15% EtOH, and C) concentration-dependent sensitivity to EtOH. The  
423 plotted points in each curve represent the average OD<sub>660</sub> values of  $\geq 3$  independent experiments,  
424 and the error bars are the standard deviation.

425 **Figure 4. YH166 displays rapid fermentation kinetics and tolerance to osmotic stress.** A) *S.*  
426 *cerevisiae* strains YH166 and WLP001 were independently inoculated into fermenters containing  
427 a 1.050 OG wort, and the fermentation kinetics were followed in real time using Wi-Fi-enabled  
428 digital hydrometers. SG is plotted on the left y-axis and ABV (%) on the right. The data shown  
429 are representative of three independent fermentations for each strain. B) Small liquid cultures of  
430 YH166 were grown in 96-well plates in YP medium supplemented with the indicated  
431 concentrations of glucose. The OD<sub>660</sub> of each well was monitored with a plate reader. The  
432 plotted points in each curve represent the average normalized OD<sub>660</sub> values of  $\geq 3$  independent  
433 experiments, and the error bars are the standard deviation. C) Spider plot of aroma descriptors  
434 for beers fermented with YH166 (see Supplementary Materials for details). D) Spider plot of  
435 flavor descriptors for beers fermented with YH166 (see Supplementary Materials for details).

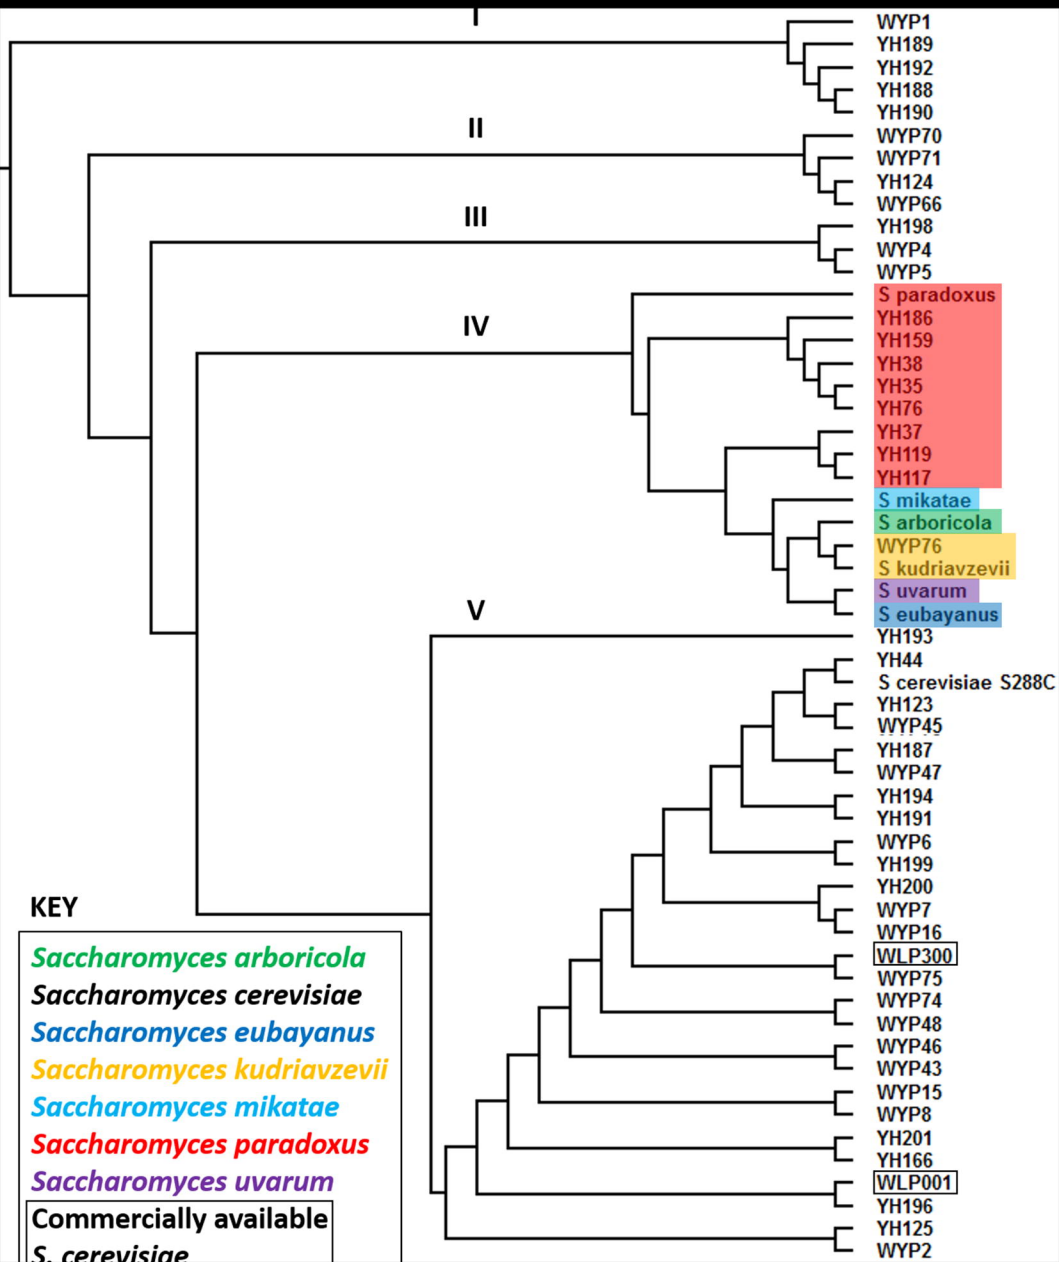

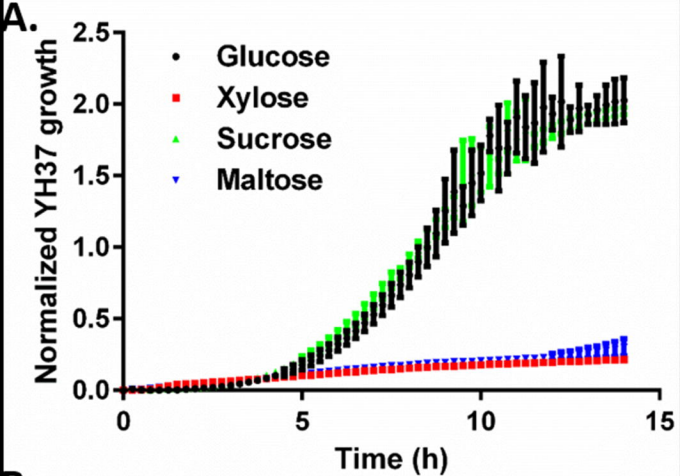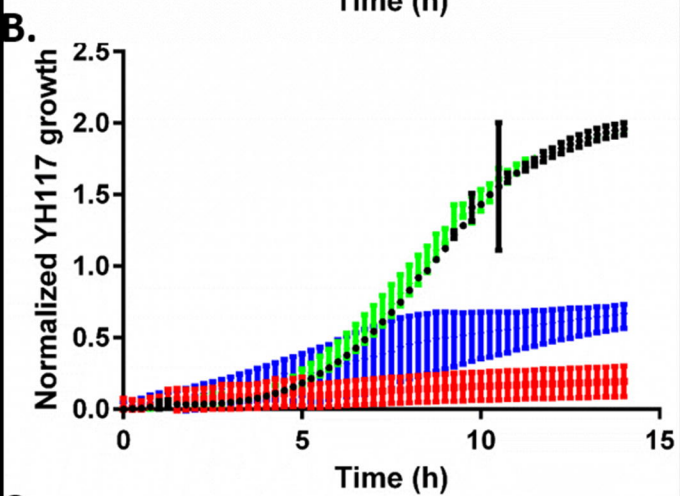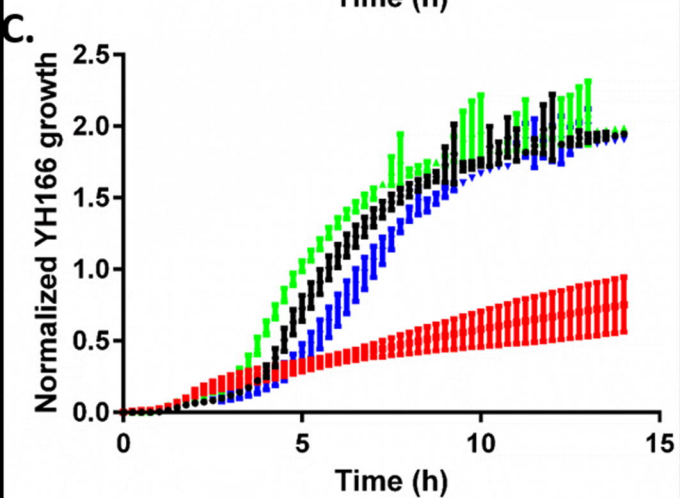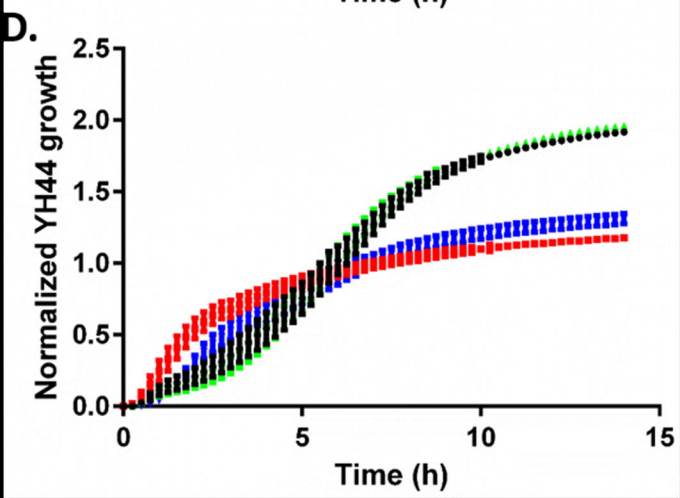

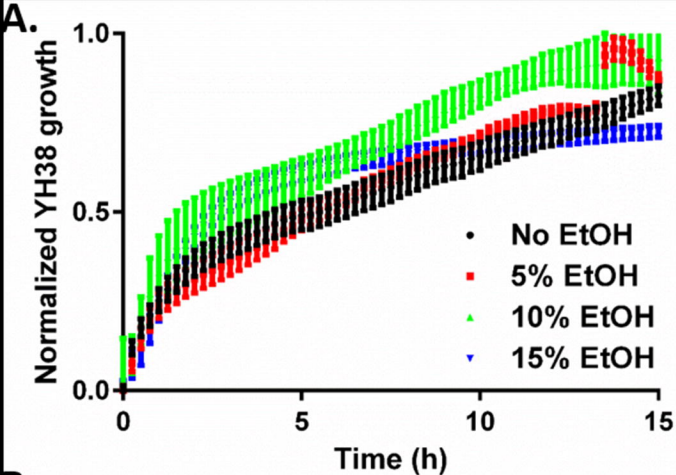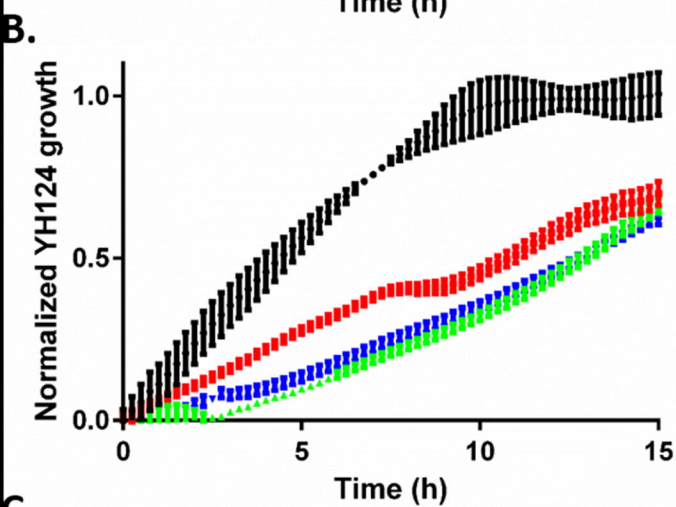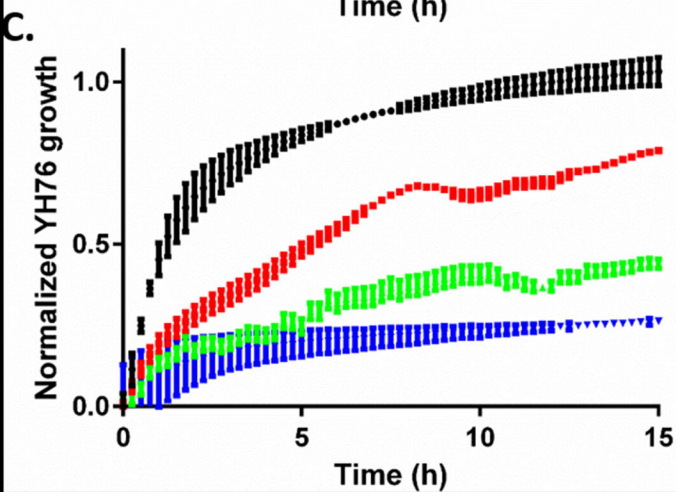

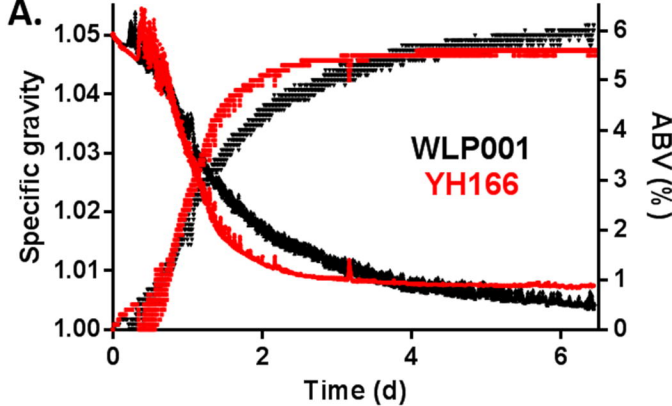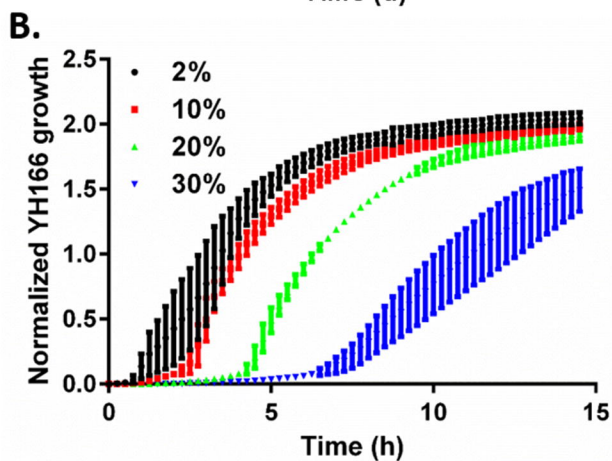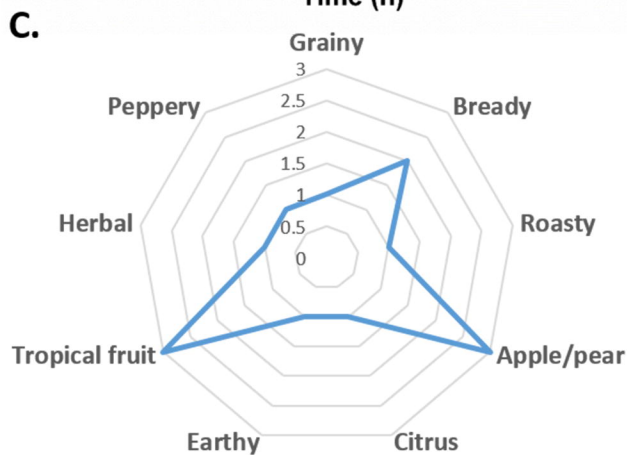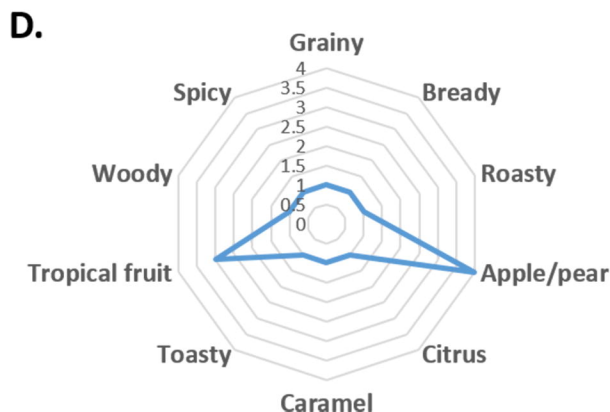

Source: https://www.biorxiv.org/content/10.1101/149732v2.full.pdf
